# Supplementary material for: Modulation of Polar Mesospheric Summer Echoes (PMSE) during HF Heating
Source: Copernicus journal article supplement (doi:10.5194/angeo-2022-16), 2022-05-18
Supplement: Supplementary file 1 [file angeo-2022-16-supplement-version1.pdf]

## Supplementary Material

### 1 Overview of the measurements

#### 1.1 Night of Aug 11/12, 2018

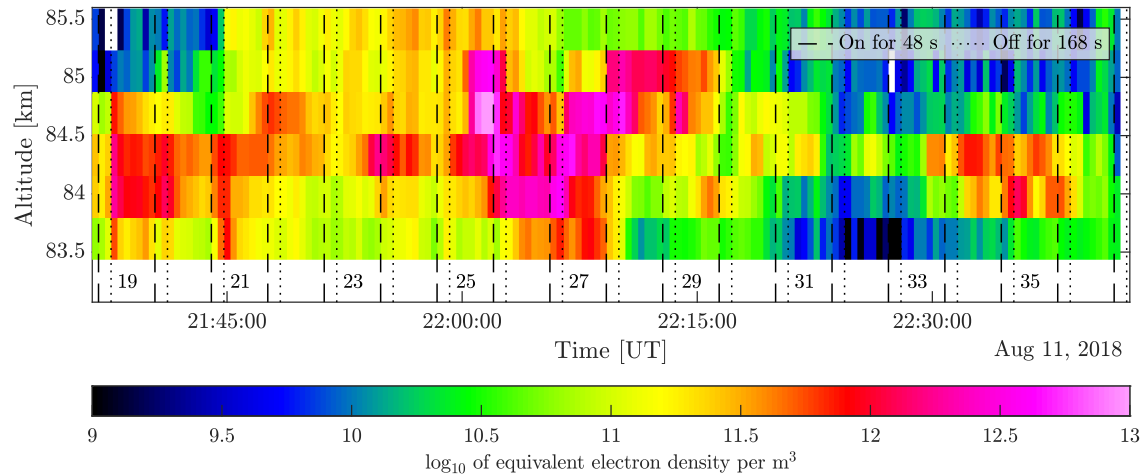

**Figure S1.** Back scattered power as function of altitude and heating intervals observed during the night of August 11/12, 2018 in Area 1.

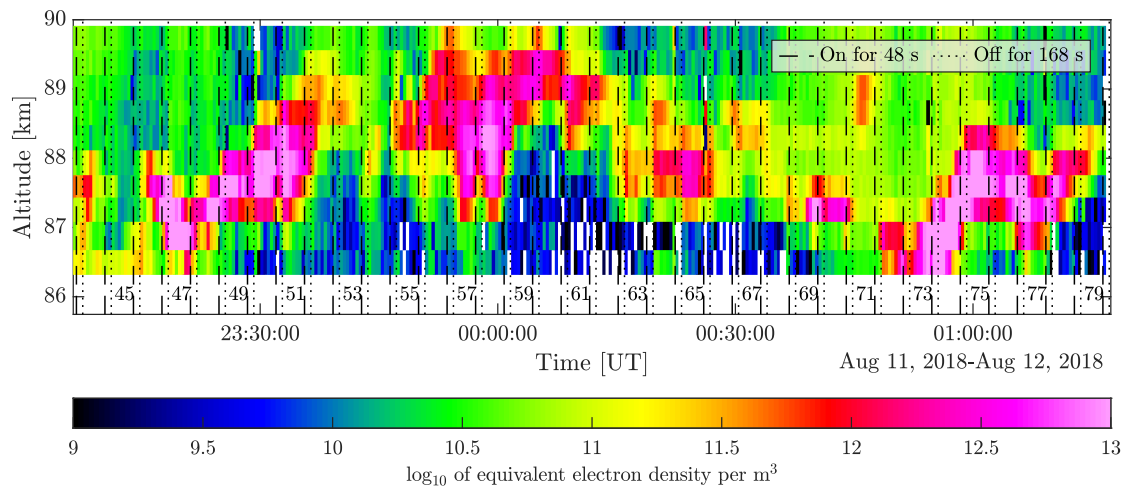

**Figure S2.** Back scattered power as function of altitude and heating intervals observed during the night of August 11/12, 2018 in Area 2.

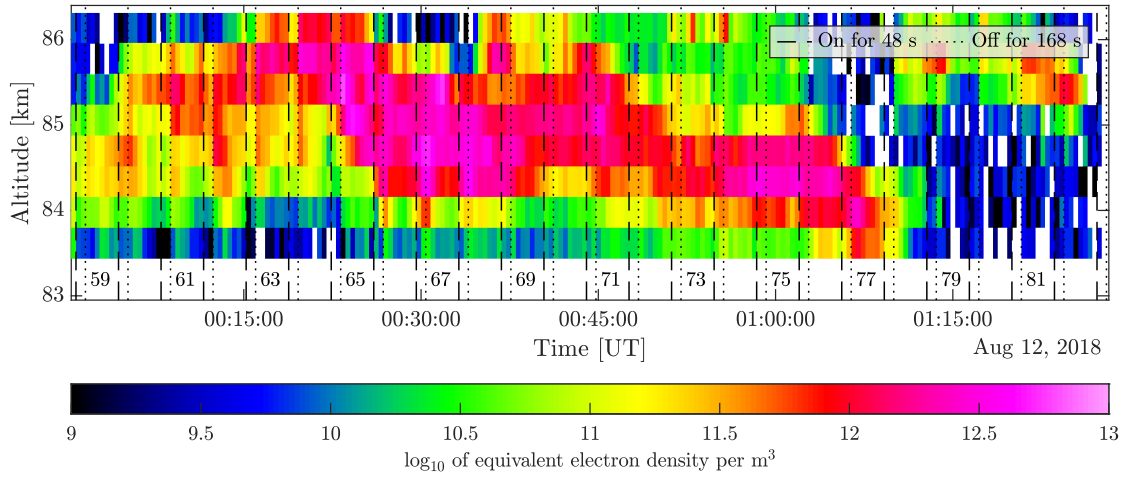

**Figure S3.** Back scattered power as function of altitude and heating intervals observed during the night of August 11/12, 2018 in Area 3.

## 1.2 Night of Aug 15/16, 2018

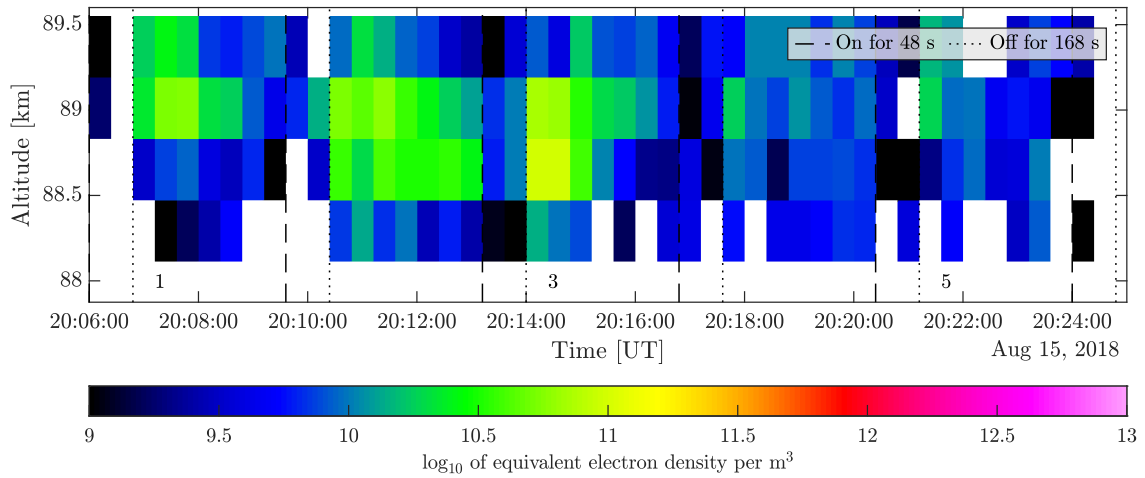

**Figure S4.** Back scattered power as function of altitude and heating intervals observed during the night of August 15/16, 2018 in Area 1.

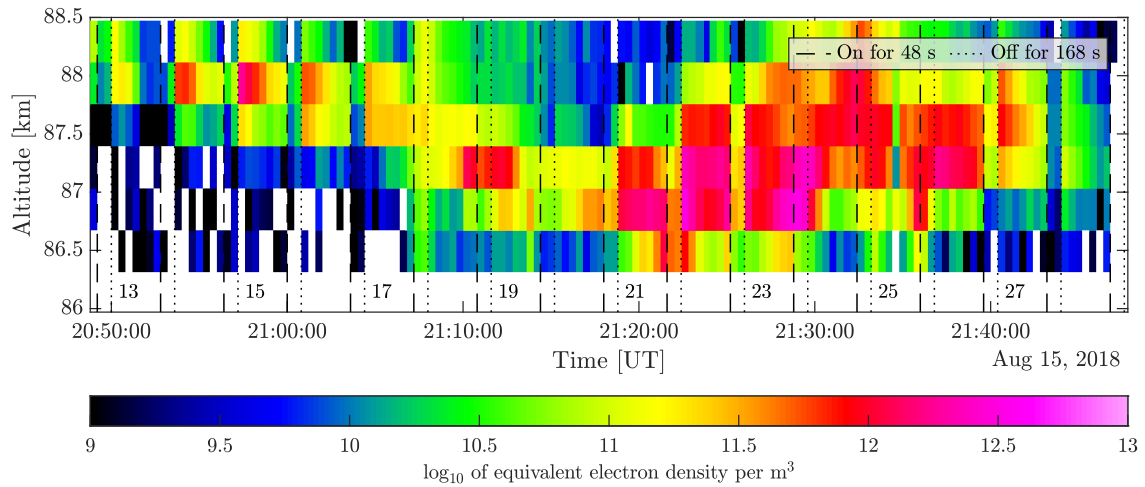

**Figure S5.** Back scattered power as function of altitude and heating intervals observed during the night of August 15/16, 2018 in Area 2.

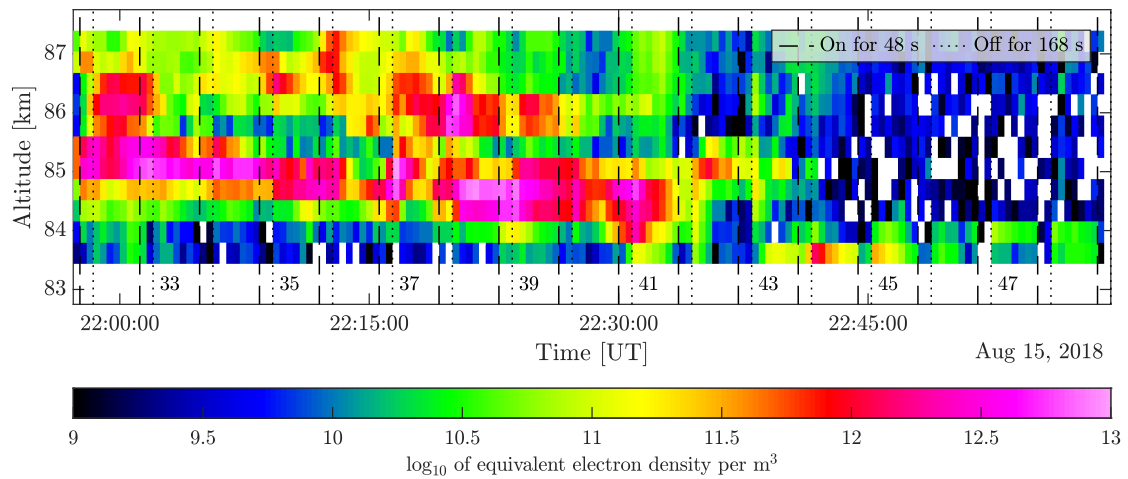

**Figure S6.** Back scattered power as function of altitude and heating intervals observed during the night of August 15/16, 2018 in Area 3.

### 5 1.3 Night of Aug 05/06, 2020

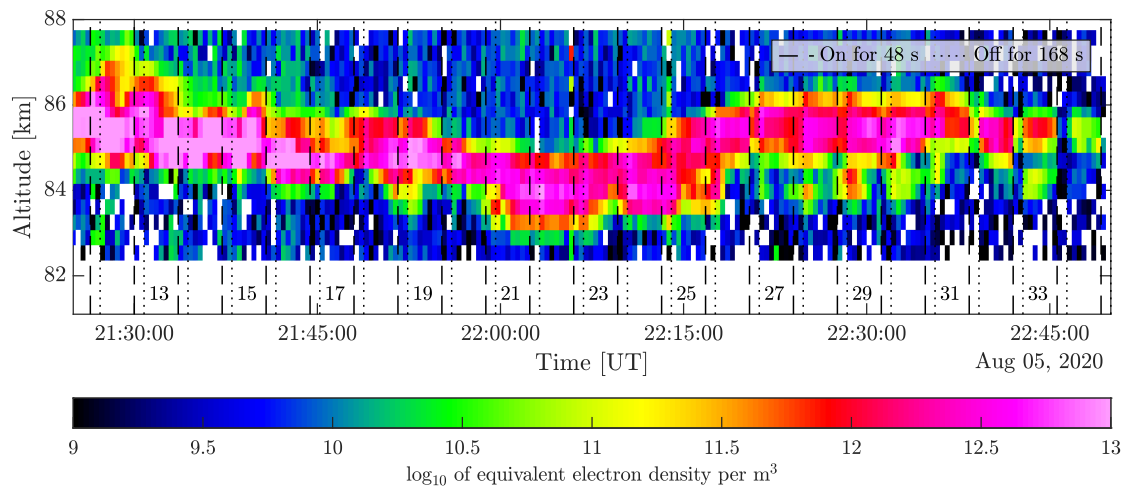

**Figure S7.** Back scattered power as function of altitude and heating intervals observed during the night of August 05/06, 2020 in Area 1.

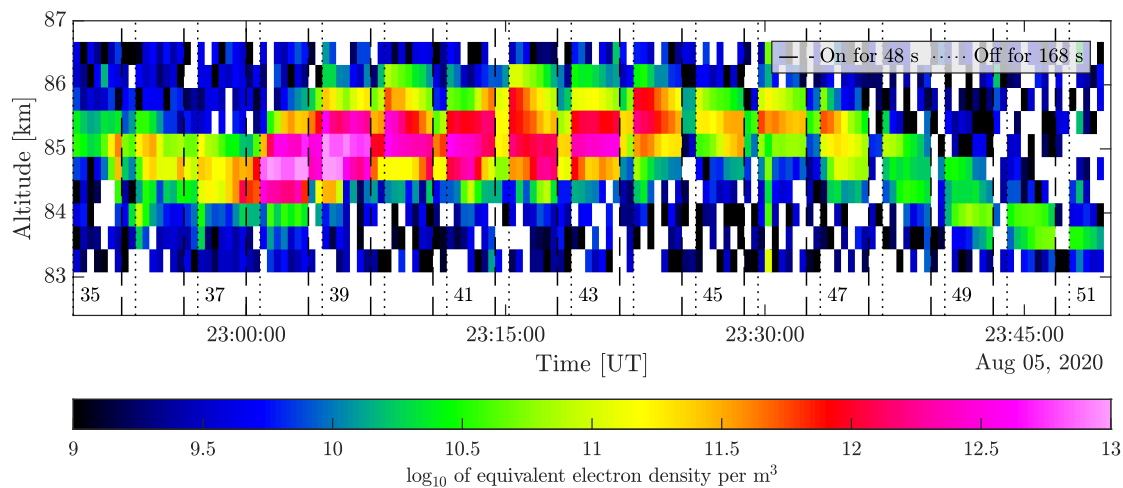

**Figure S8.** Back scattered power as function of altitude and heating intervals observed during the night of August 05/06, 2020 in Area 2.

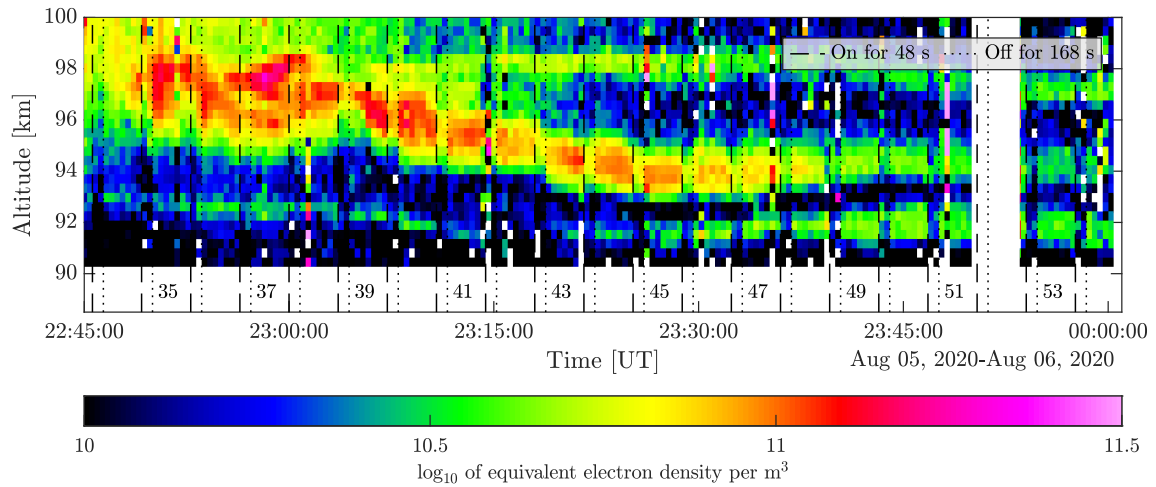

**Figure S9.** Back scattered power as function of altitude and heating intervals observed during the night of August 05/06, 2020 in Area 3. It should be noted that other limits of the colour scale have been chosen for this plot.

#### 1.4 Night of Aug 06/07, 2020

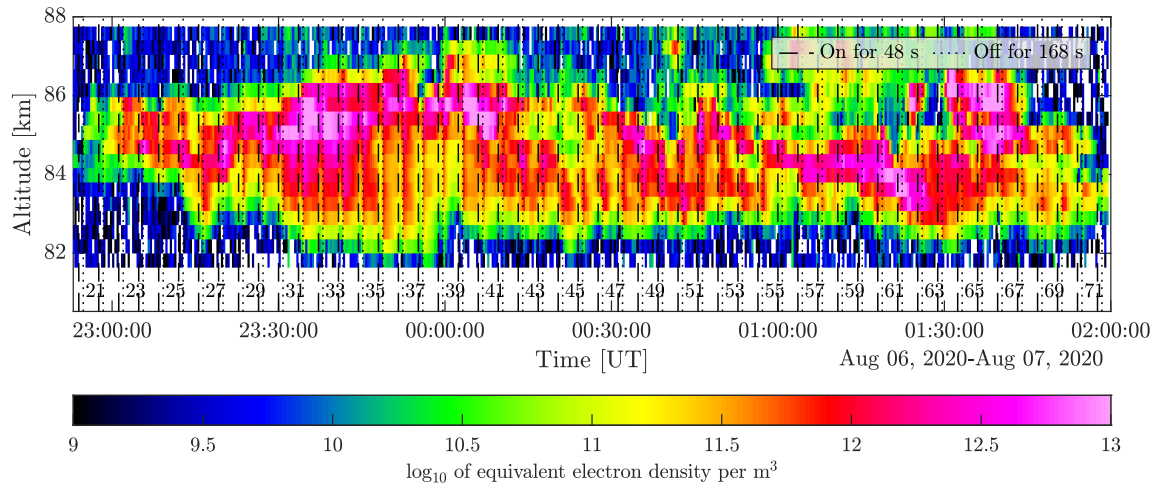

**Figure S10.** Back scattered power as function of altitude and heating intervals observed during the night of August 06/07, 2020 in Area 1.

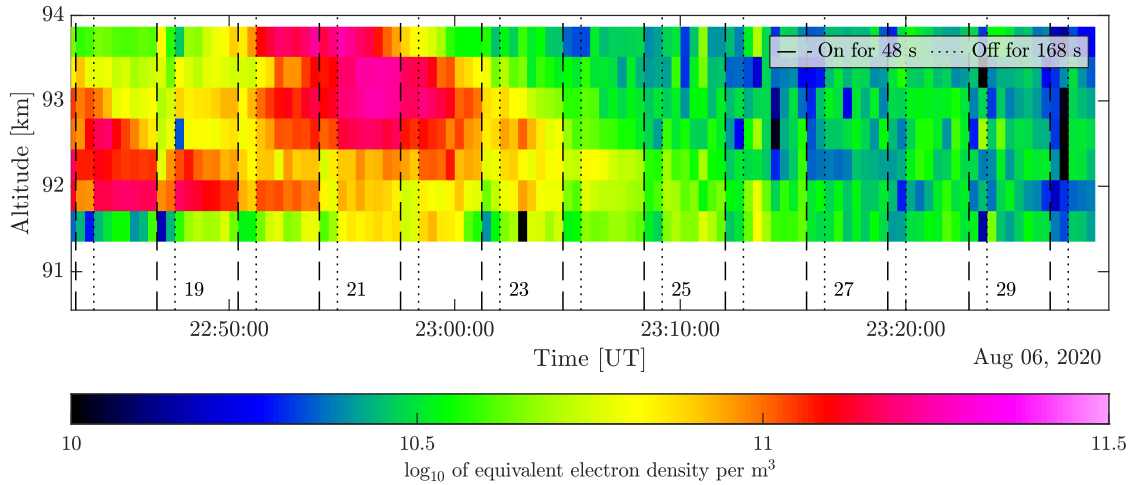

**Figure S11.** Back scattered power as function of altitude and heating intervals observed during the night of August 06/07, 2020 in Area 2. It should be noted that other limits of the colour scale have been chosen for this plot.

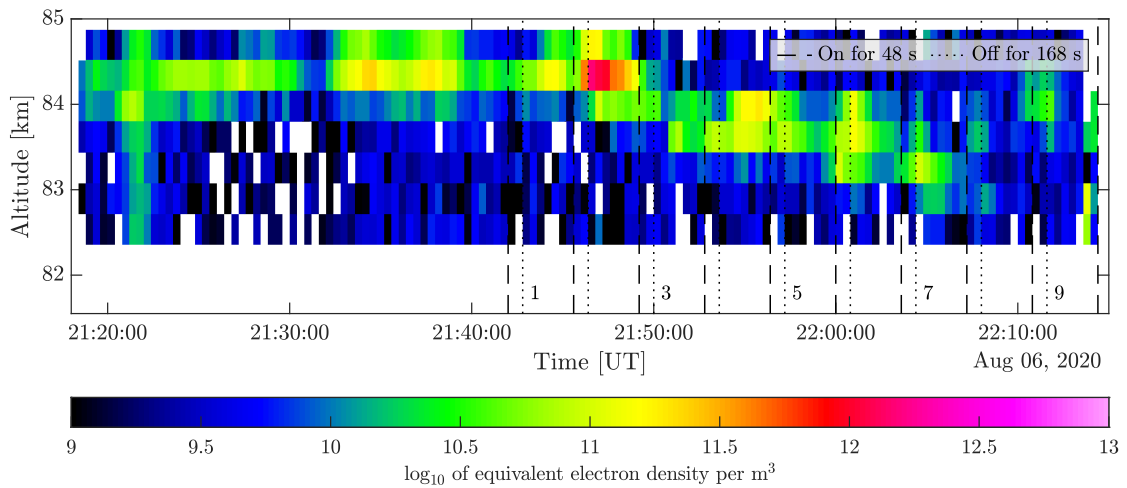

**Figure S12.** Back scattered power as function of altitude and heating intervals observed during the night of August 06/07, 2020 in Area 3.

## 2 Selected detailed PMSE signal

### 2.1 Night of Aug 15/16, 2018

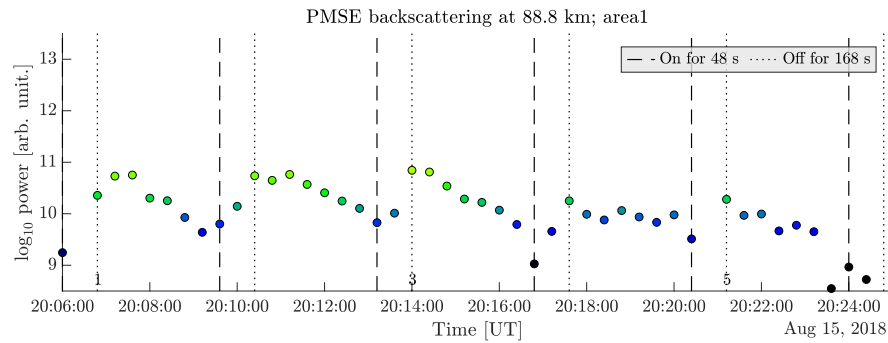

**Figure S13.** Back scattered power at altitude 88.8 km and heating intervals observed during the night of August 15/16, 2018 in area 1. The colour of the dots follow the colour scale of Fig. S4.

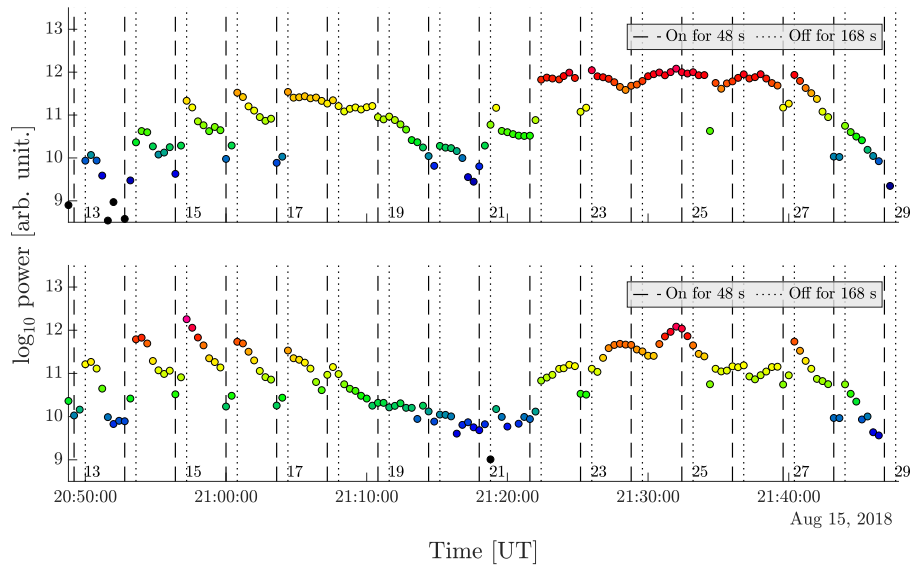

**Figure S14.** Back scattered power at altitude 87.4 and 87.8 km and heating intervals observed during the night of August 15/16, 2018 in area 2. The colour of the dots follow the colour scale of Fig. S5.

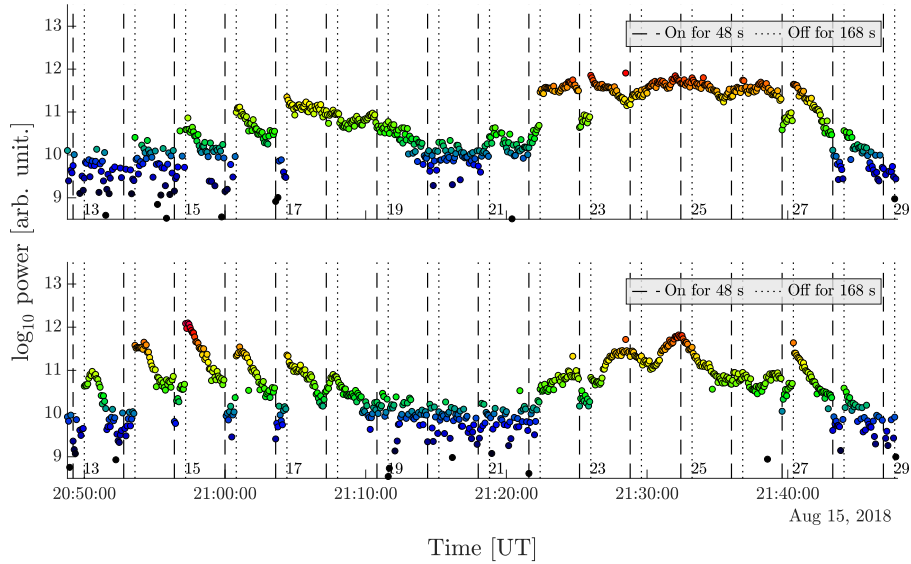

**Figure S15.** Back scattered power at altitude 87.4 and 87.8 km and heating intervals observed during the night of August 15/16, 2018 in area 2. Each 4.8 seconds there is a data point, usually the interval is 24 seconds. The colour of the dots follow the colour scale of Fig. S5.

## 2.2 Night of Aug 05/06, 2020

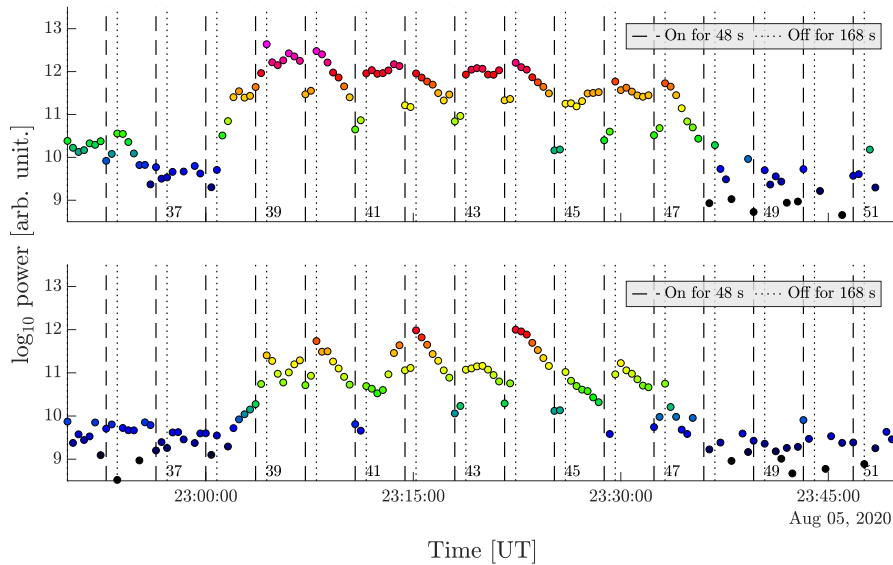

**Figure S16.** Back scattered power at altitude 85.2 and 85.6 km and heating intervals observed during the night of August 05/06, 2020 in area 2. The colour of the dots follow the colour scale of Fig. S8.



10 3 Comparison of power amplitudes

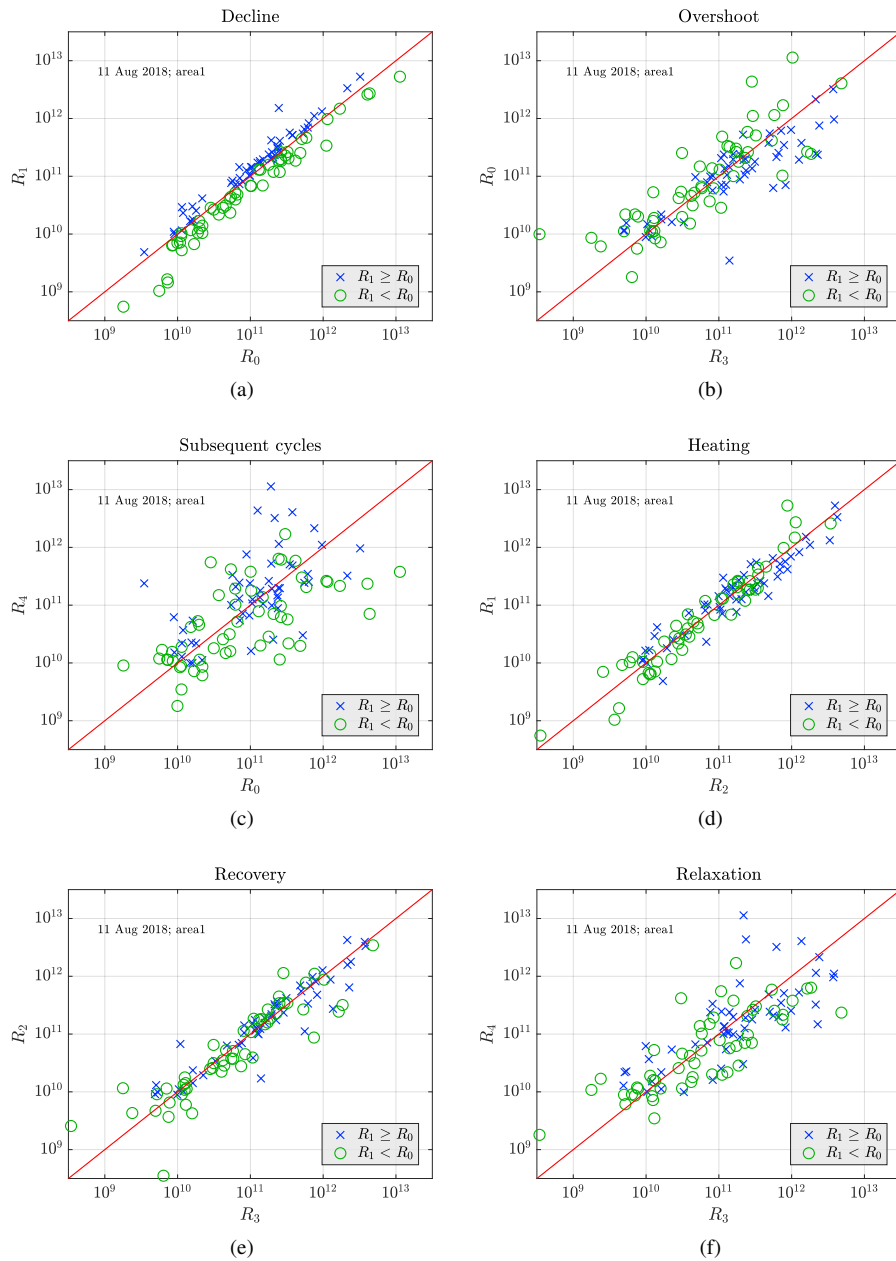

Figure S17. Comparison of the power amplitudes observed on the 11 August 2018 in Area 1.

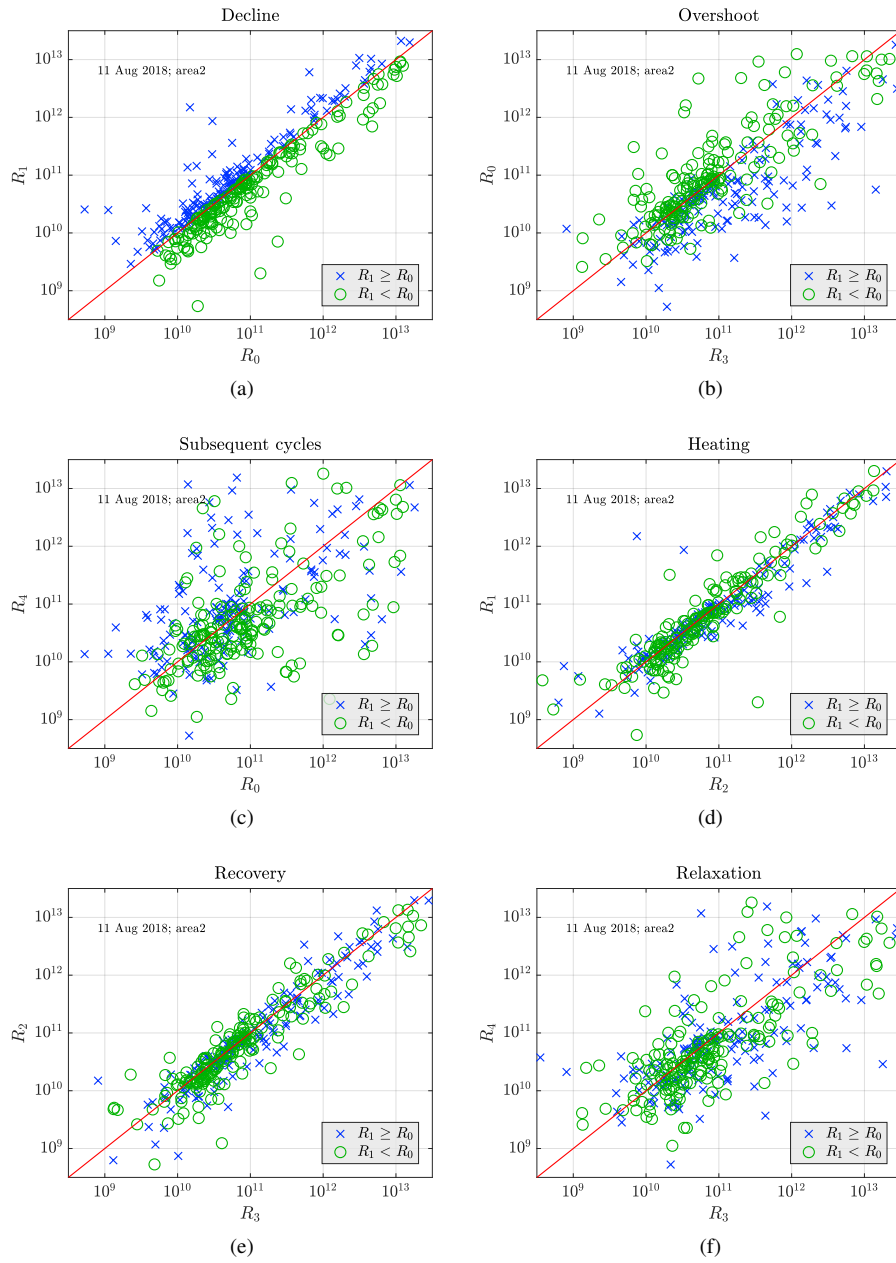

**Figure S18.** Comparison of the power amplitudes observed on the 11 August 2018 in Area 2.

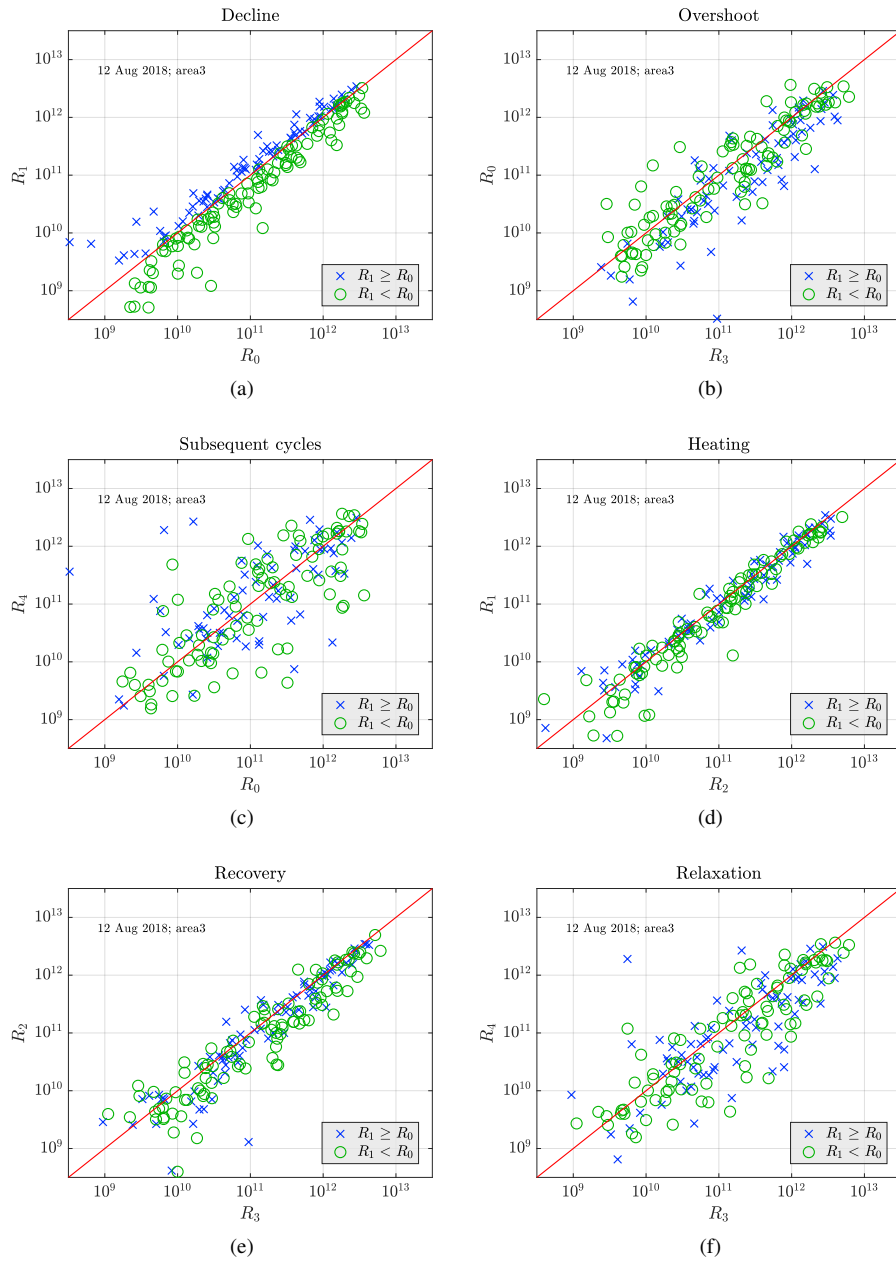

**Figure S19.** Comparison of the power amplitudes observed on the 11 August 2018 in Area 3.

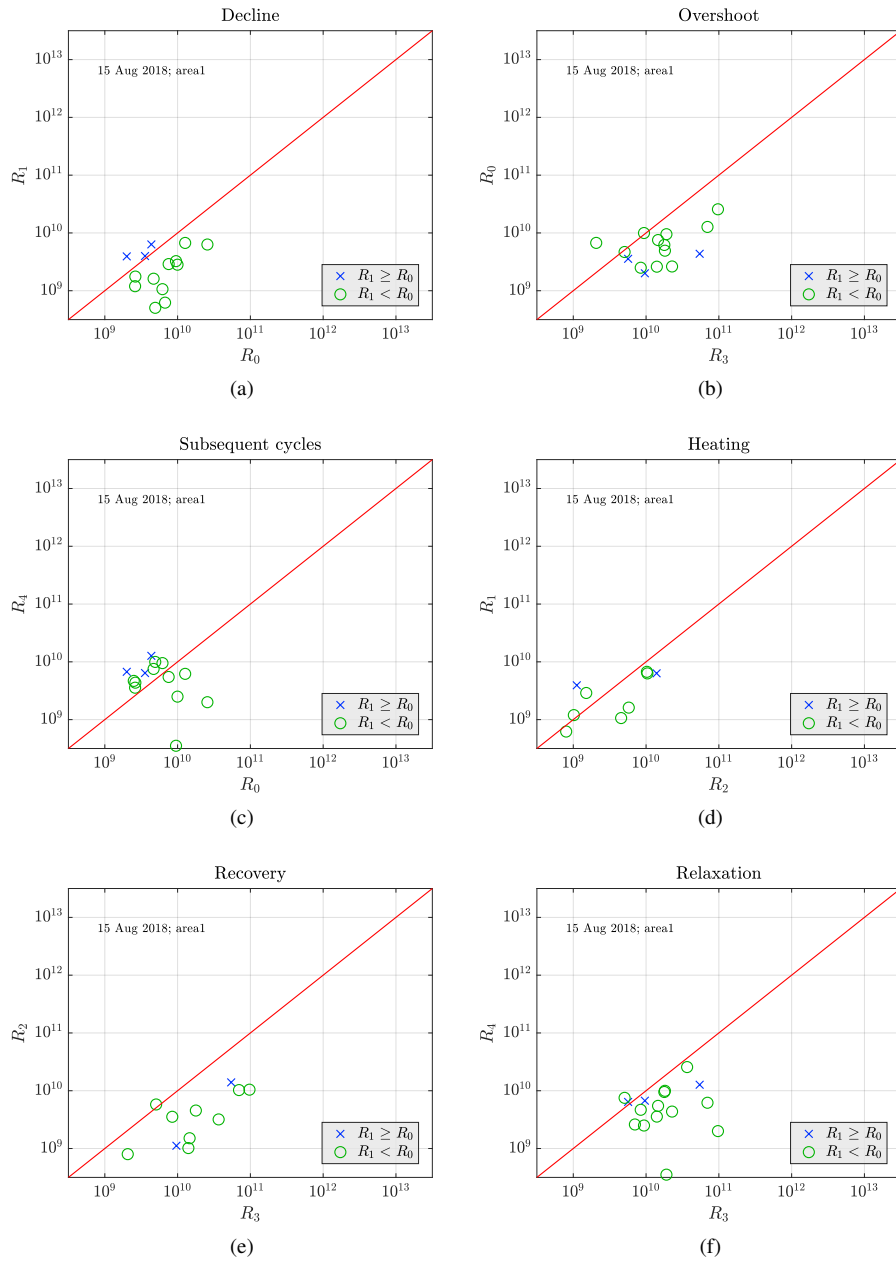

**Figure S20.** Comparison of the power amplitudes observed on the 15 August 2018 in Area 1.

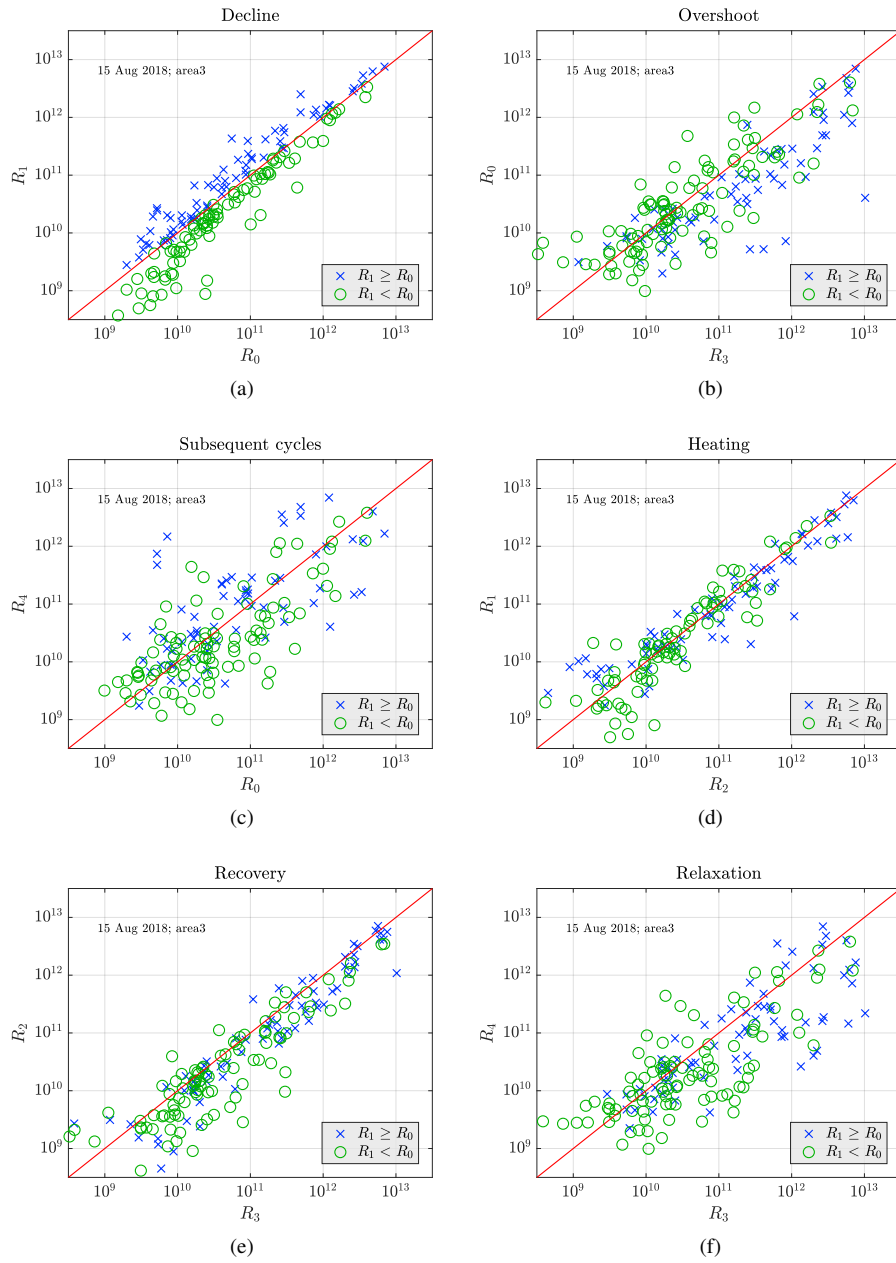

**Figure S21.** Comparison of the power amplitudes observed on the 15 August 2018 in Area 3.

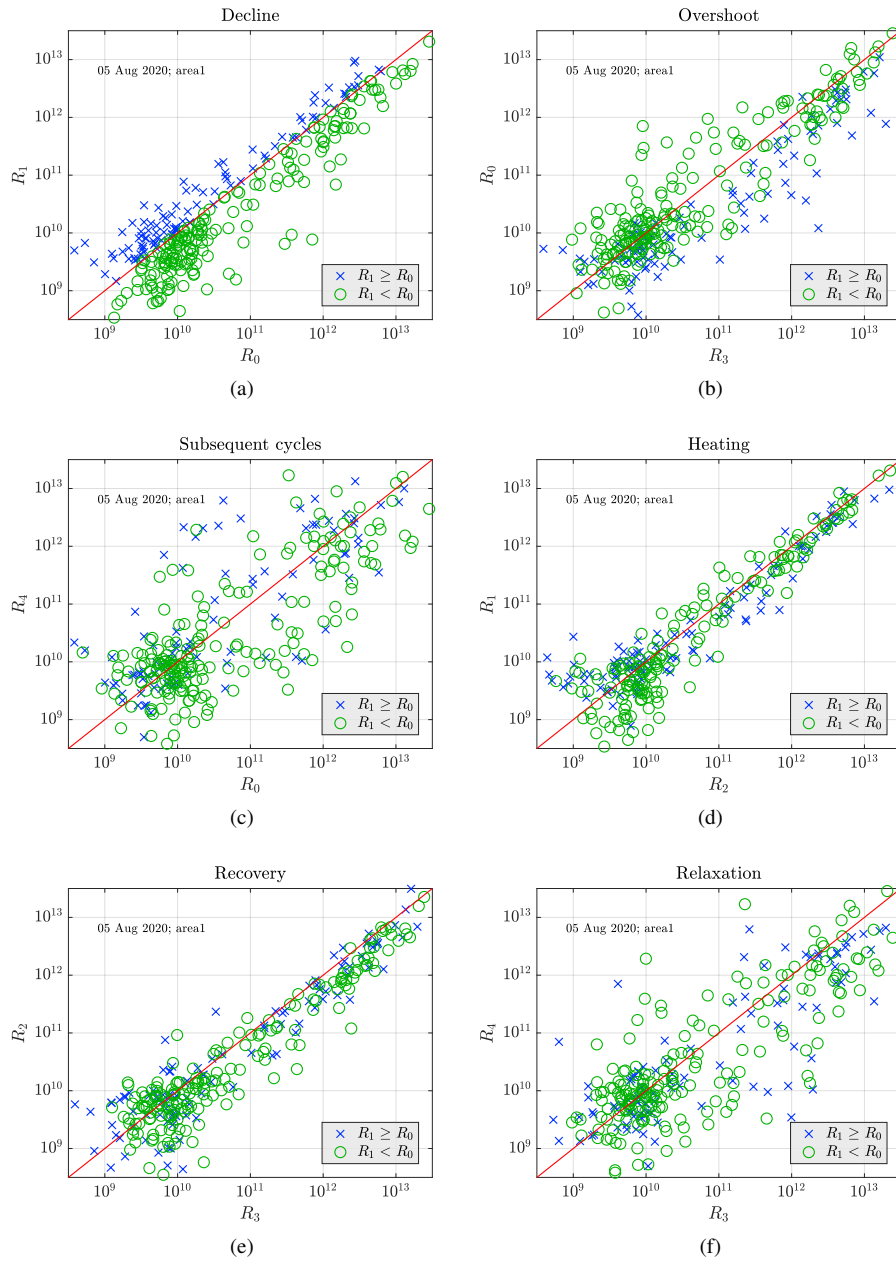

**Figure S22.** Comparison of the power amplitudes observed on the 5 August 2020 in Area 1.

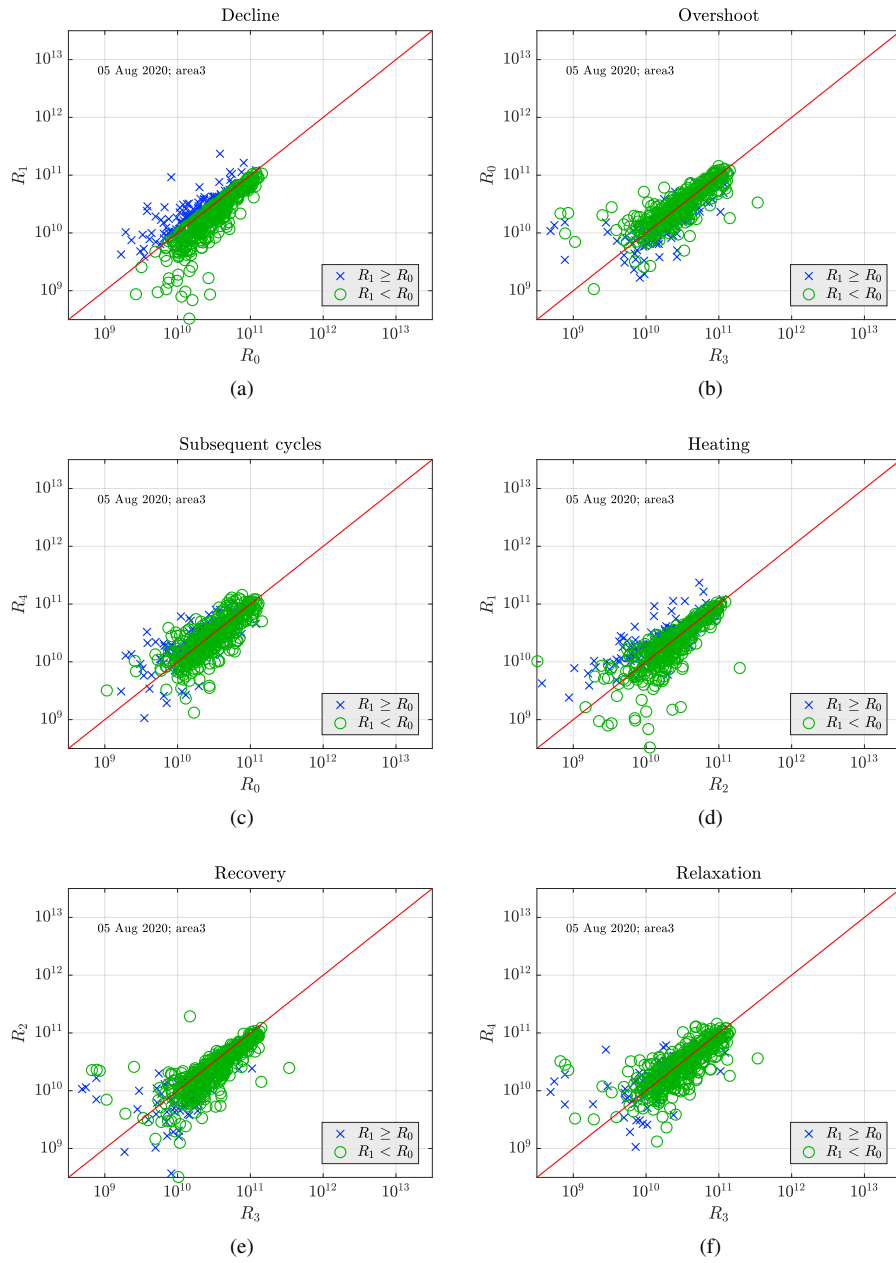

**Figure S23.** Comparison of the power amplitudes observed on the 5 August 2020 in Area 3.

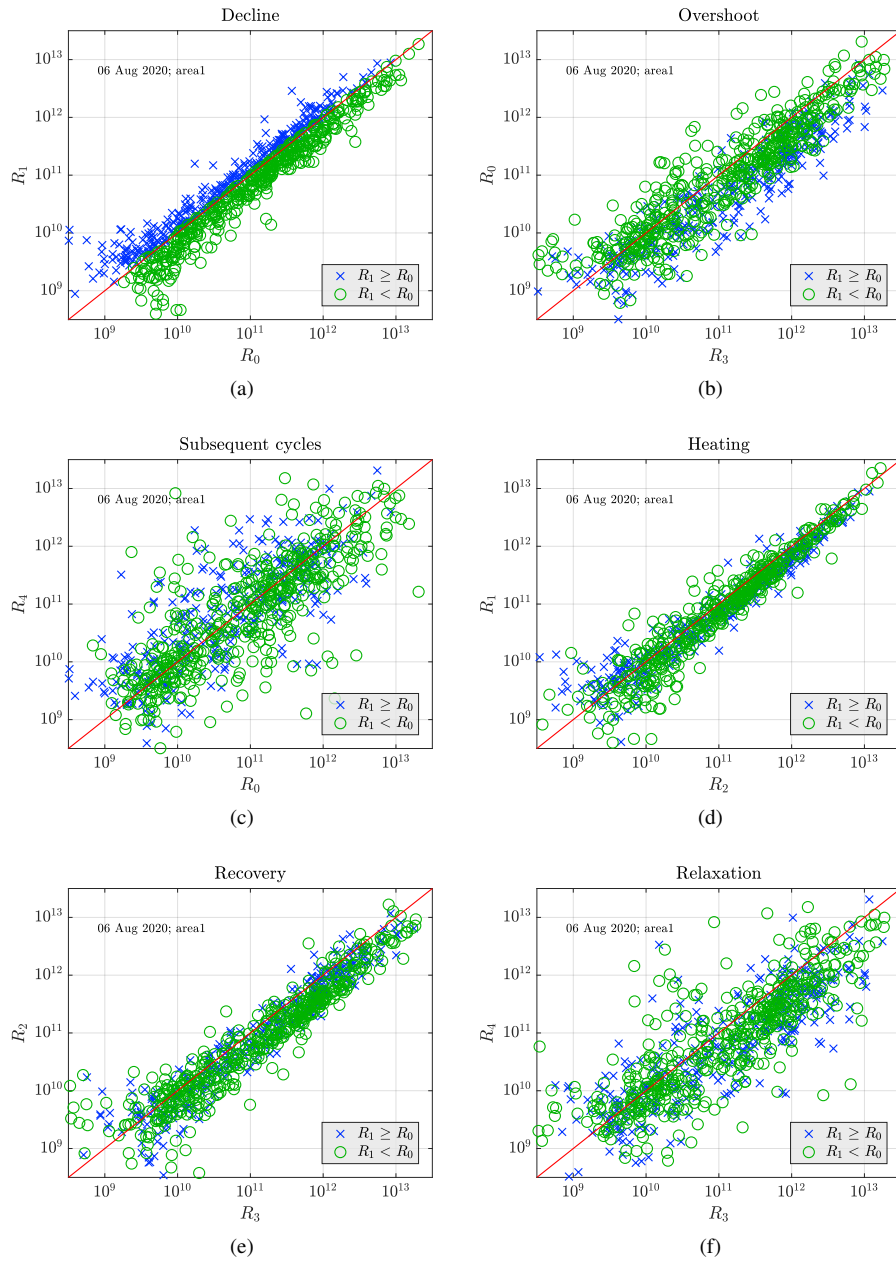

**Figure S24.** Comparison of the power amplitudes observed on the 6 August 2020 in Area 1.



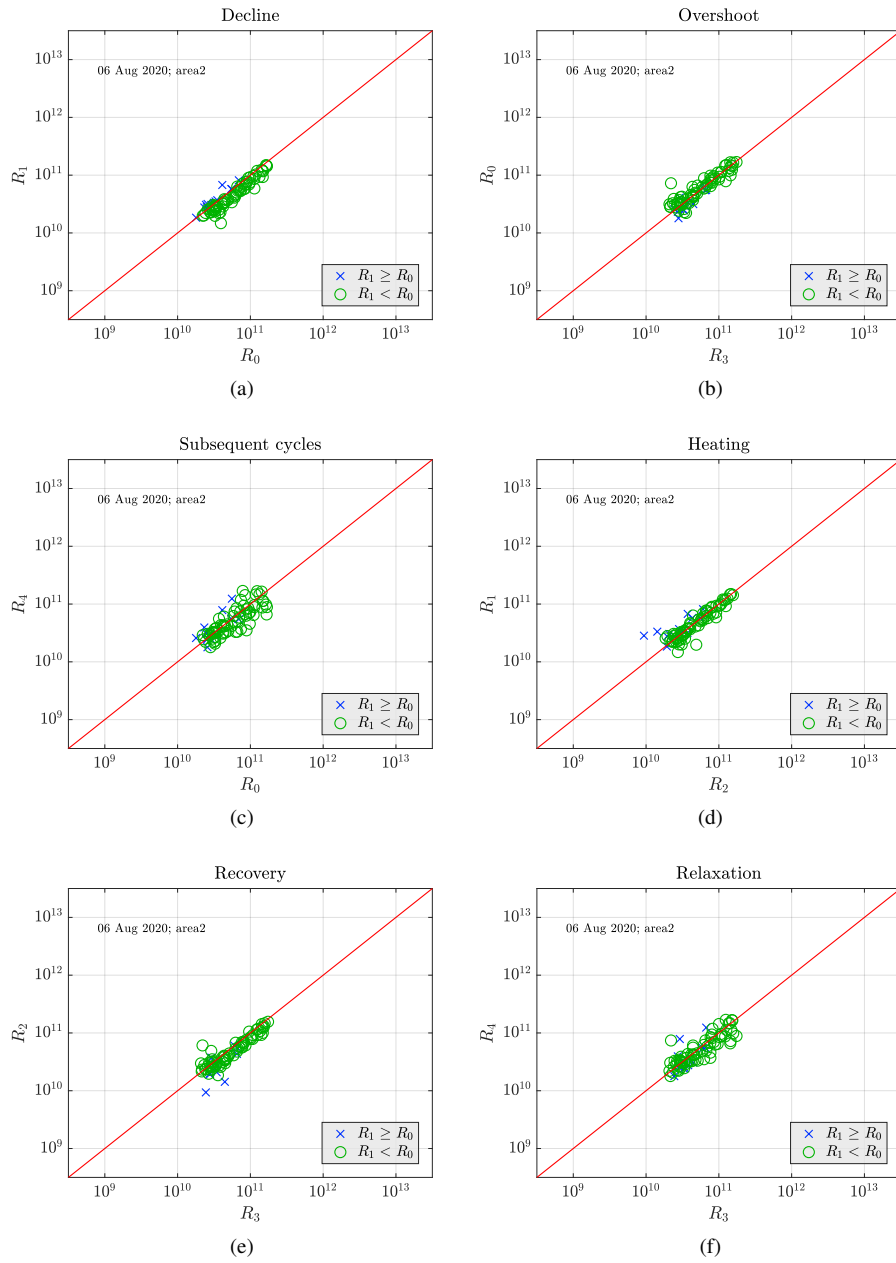

**Figure S25.** Comparison of the power amplitudes observed on the 6 August 2020 in Area 2.

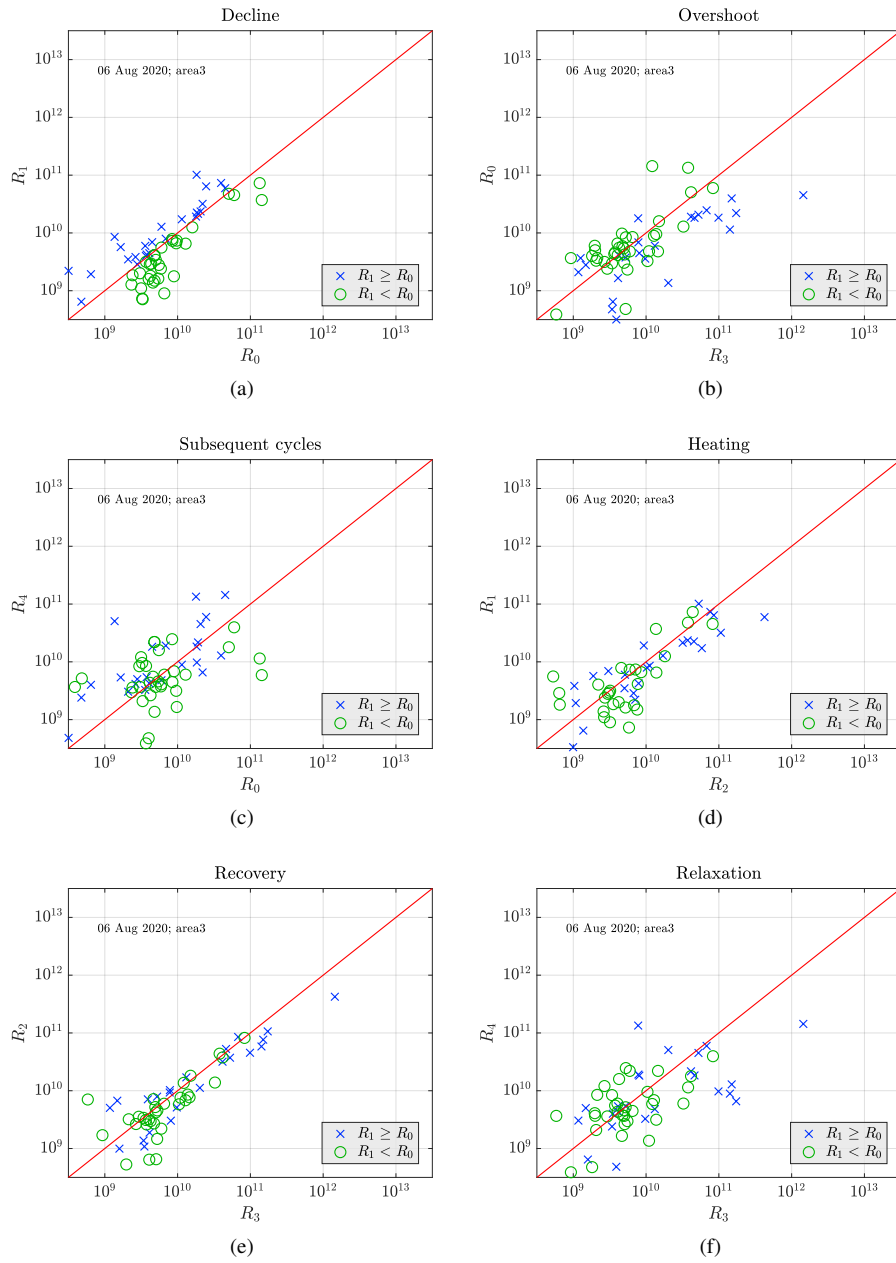

**Figure S26.** Comparison of the power amplitudes observed on the 6 August 2020 in Area 3.

#### 4 Histograms of heating cycle ratios with averages

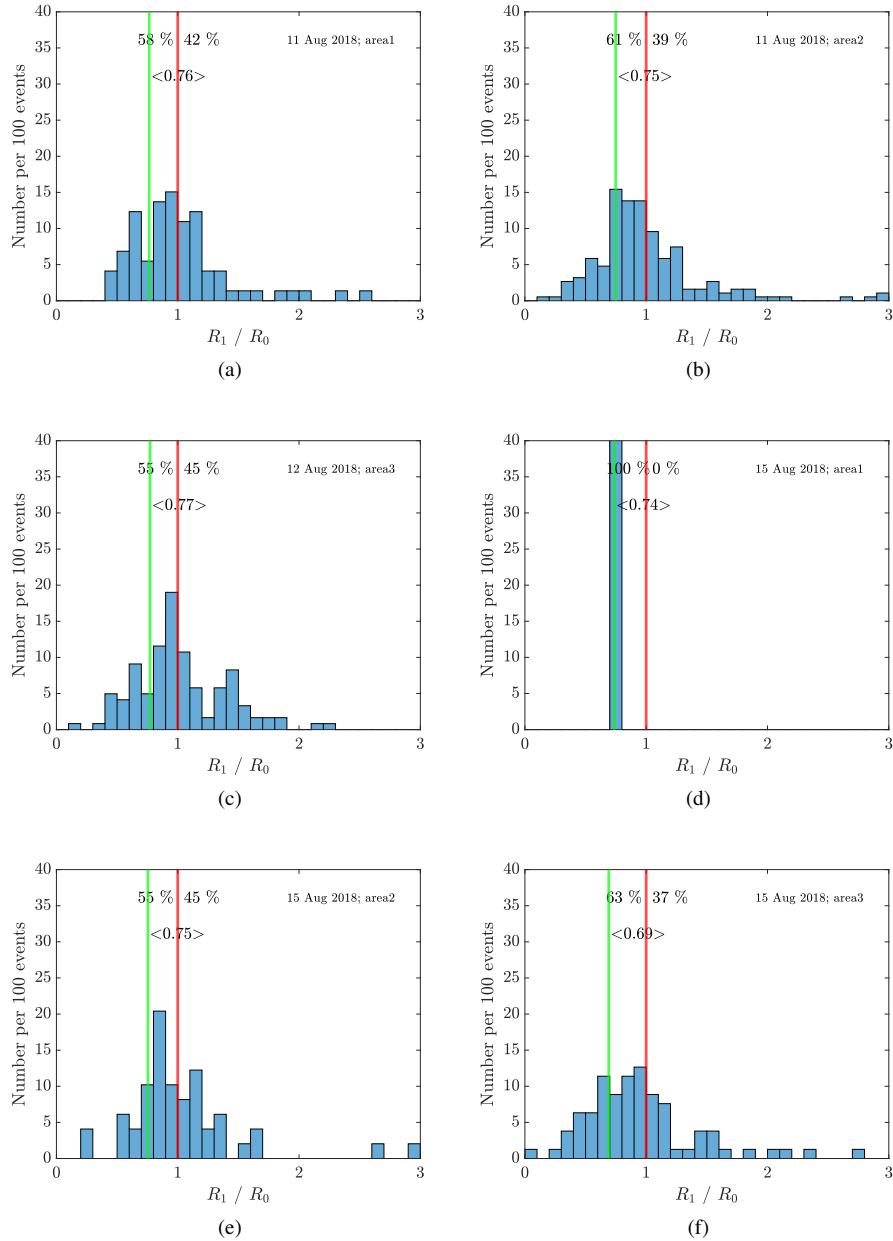

**Figure S27.** Average of the decline for the observed data on the 11 and 15 August 2018. Only overshoot curves with a minimal background amplitude of  $R_0 > 10^{10.5}$  are considered. The ratios are chosen in such a way, that, if we observe an overshoot curve like shown in Fig. ??, all ratios are smaller than 1. Thus, the histograms are clipped at a maximum ratio of 3. The green line and the corresponding number displays the mean for all ratios smaller than 1.

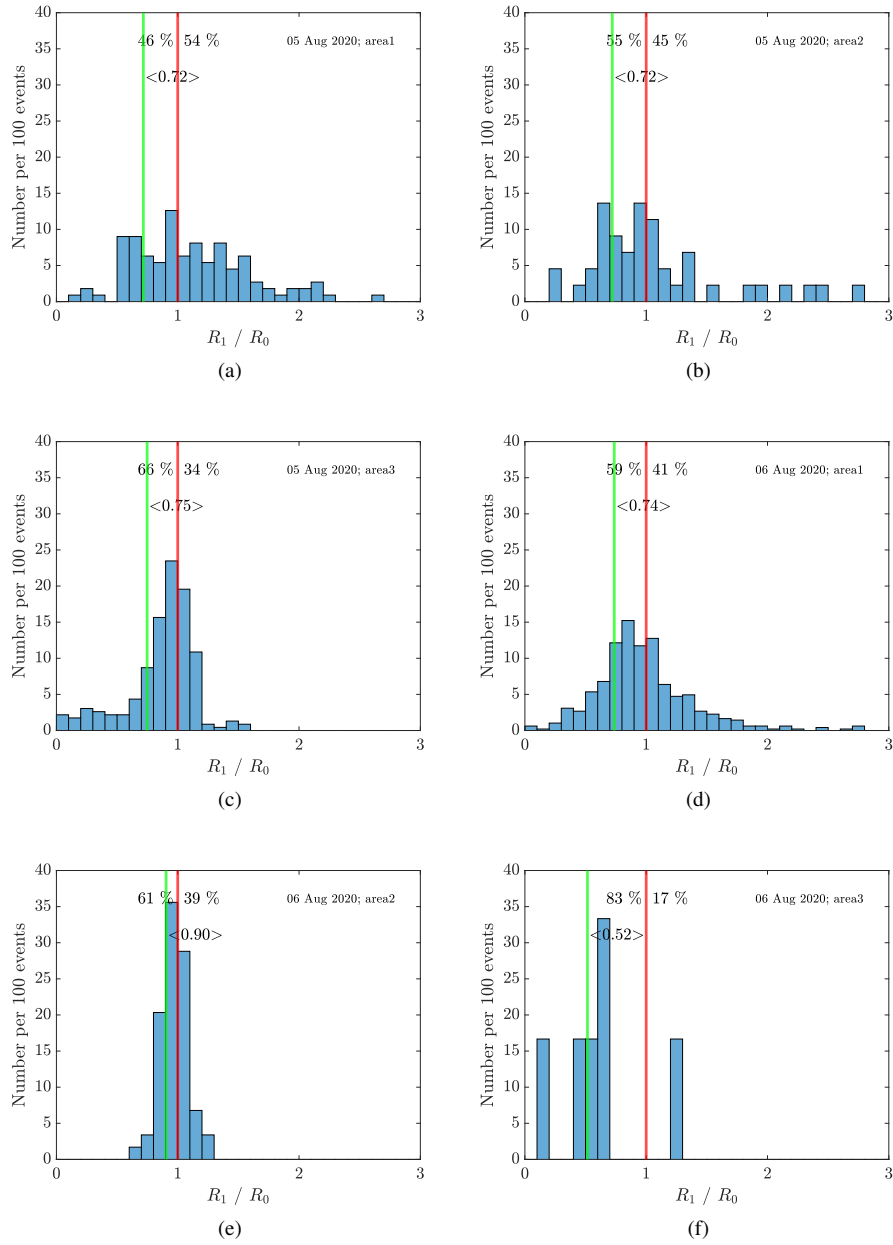

**Figure S28.** Average of the decline for the observed data on the 5 and 6 August 2020. Only overshoot curves with a minimal background amplitude of  $R_0 > 10^{10.5}$  are considered. The ratios are chosen in such a way, that, if we observe an overshoot curve like shown in Fig. ??, all ratios are smaller than 1. Thus, the histograms are clipped at a maximum ratio of 3. The green line and the corresponding number displays the mean for all ratios smaller than 1.

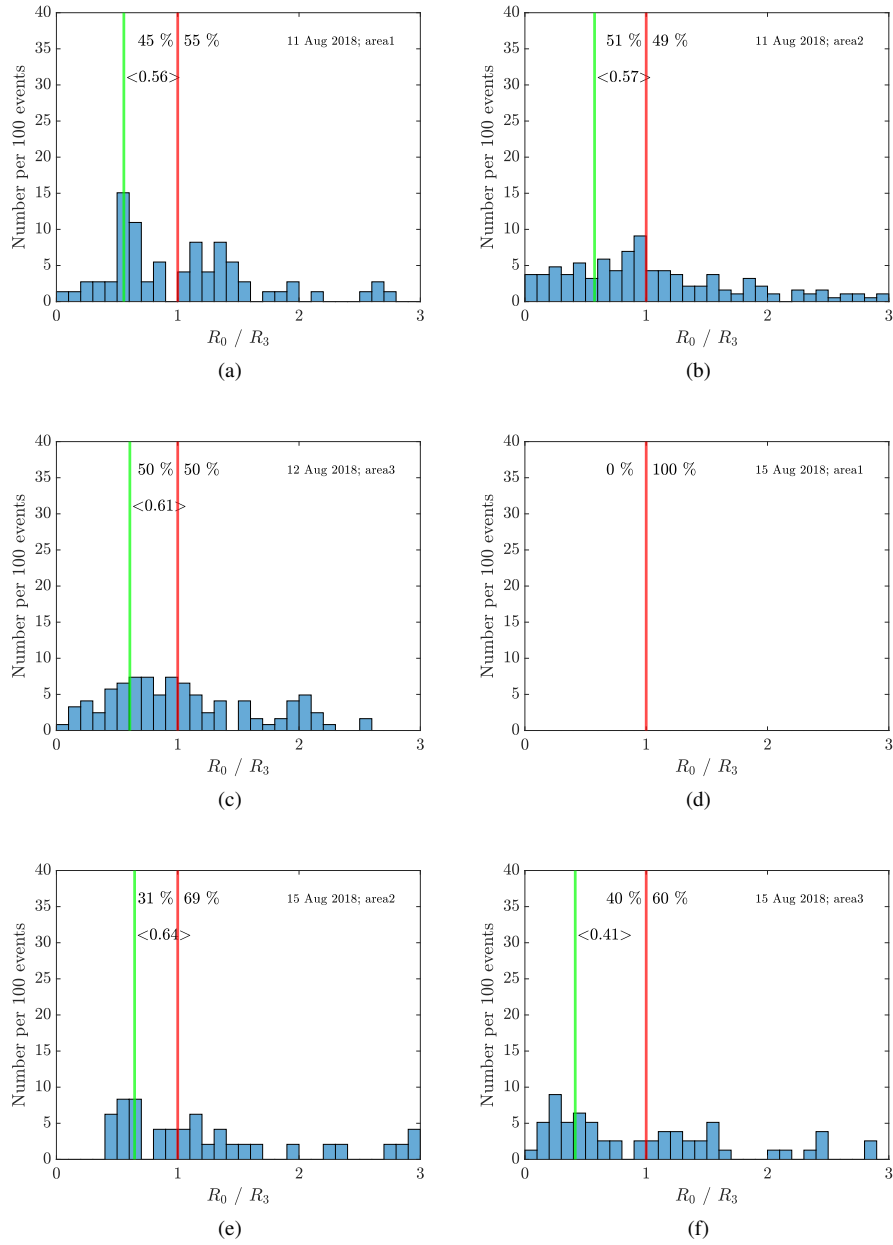

**Figure S29.** Average of the overshoot for the observed data on the 11 and 15 August 2018. Only overshoot curves with a minimal background amplitude of  $R_0 > 10^{10.5}$  are considered. The ratios are chosen in such a way, that, if we observe an overshoot curve like shown in Fig. ??, all ratios are smaller than 1. Thus, the histograms are clipped at a maximum ratio of 3. The green line and the corresponding number displays the mean for all ratios smaller than 1.

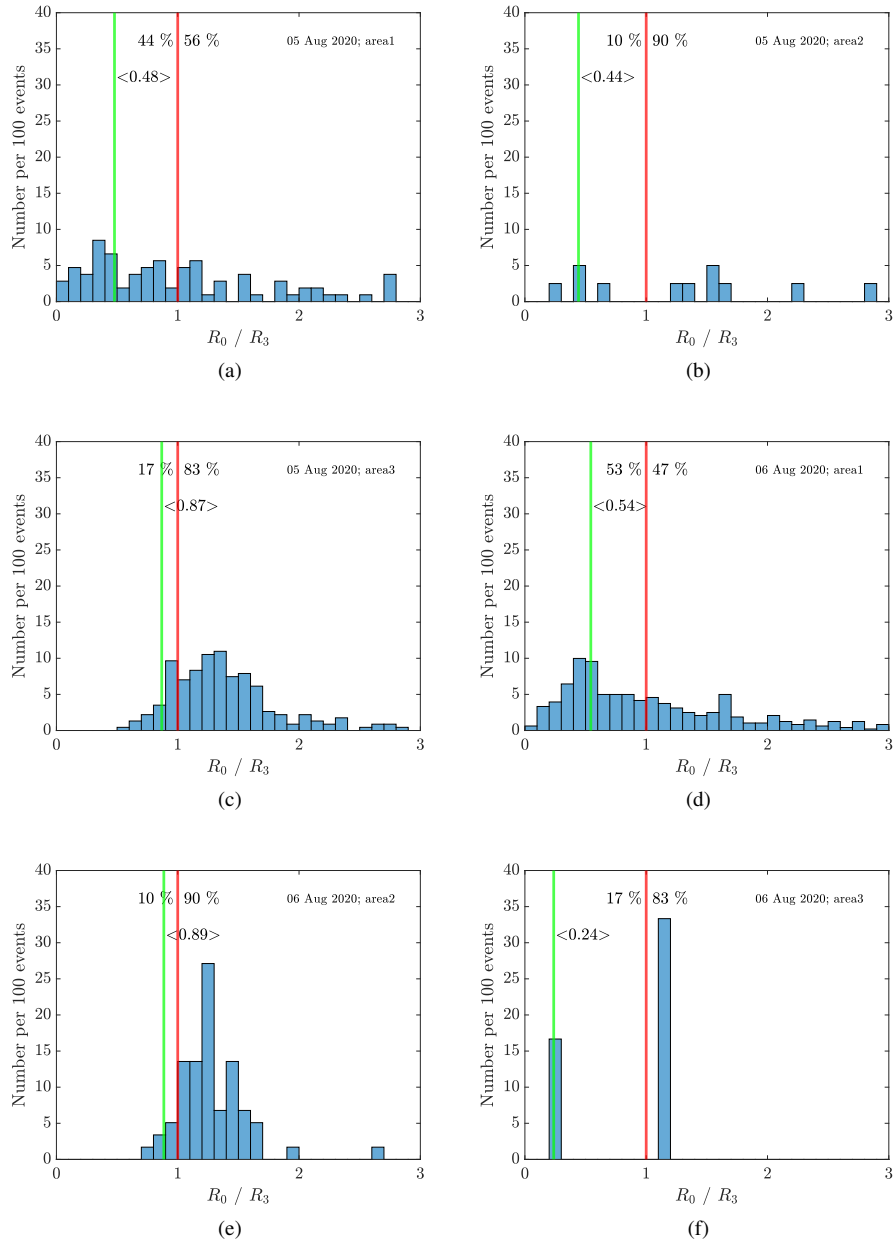

**Figure S30.** Average of the overshoot for the observed data on the 5 and 6 August 2020. Only overshoot curves with a minimal background amplitude of  $R_0 > 10^{10.5}$  are considered. The ratios are chosen in such a way, that, if we observe an overshoot curve like shown in Fig. ??, all ratios are smaller than 1. Thus, the histograms are clipped at a maximum ratio of 3. The green line and the corresponding number displays the mean for all ratios smaller than 1.

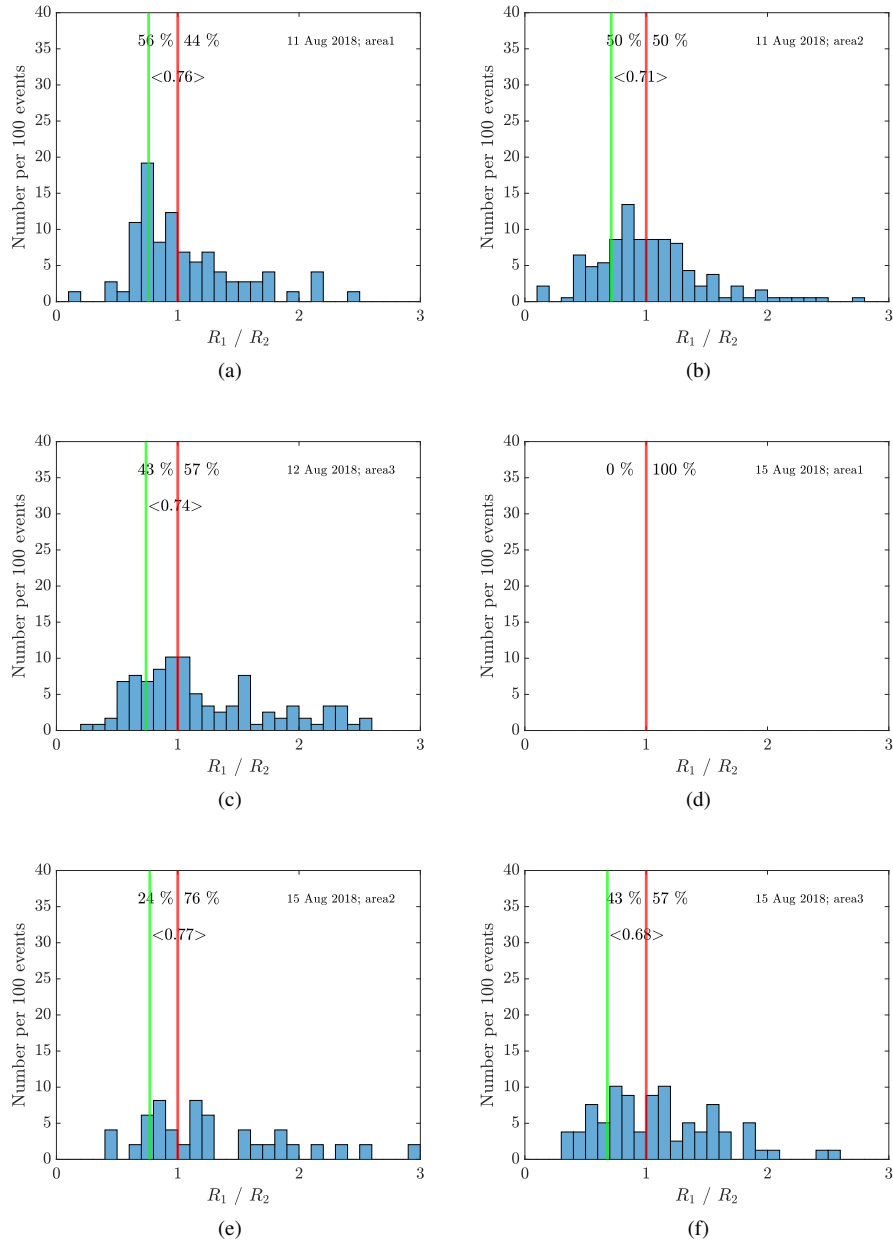

**Figure S31.** Average of the heating for the observed data on the 11 and 15 August 2018. Only overshoot curves with a minimal background amplitude of  $R_0 > 10^{10.5}$  are considered. The ratios are chosen in such a way, that, if we observe an overshoot curve like shown in Fig. ??, all ratios are smaller than 1. Thus, the histograms are clipped at a maximum ratio of 3. The green line and the corresponding number displays the mean for all ratios smaller than 1.

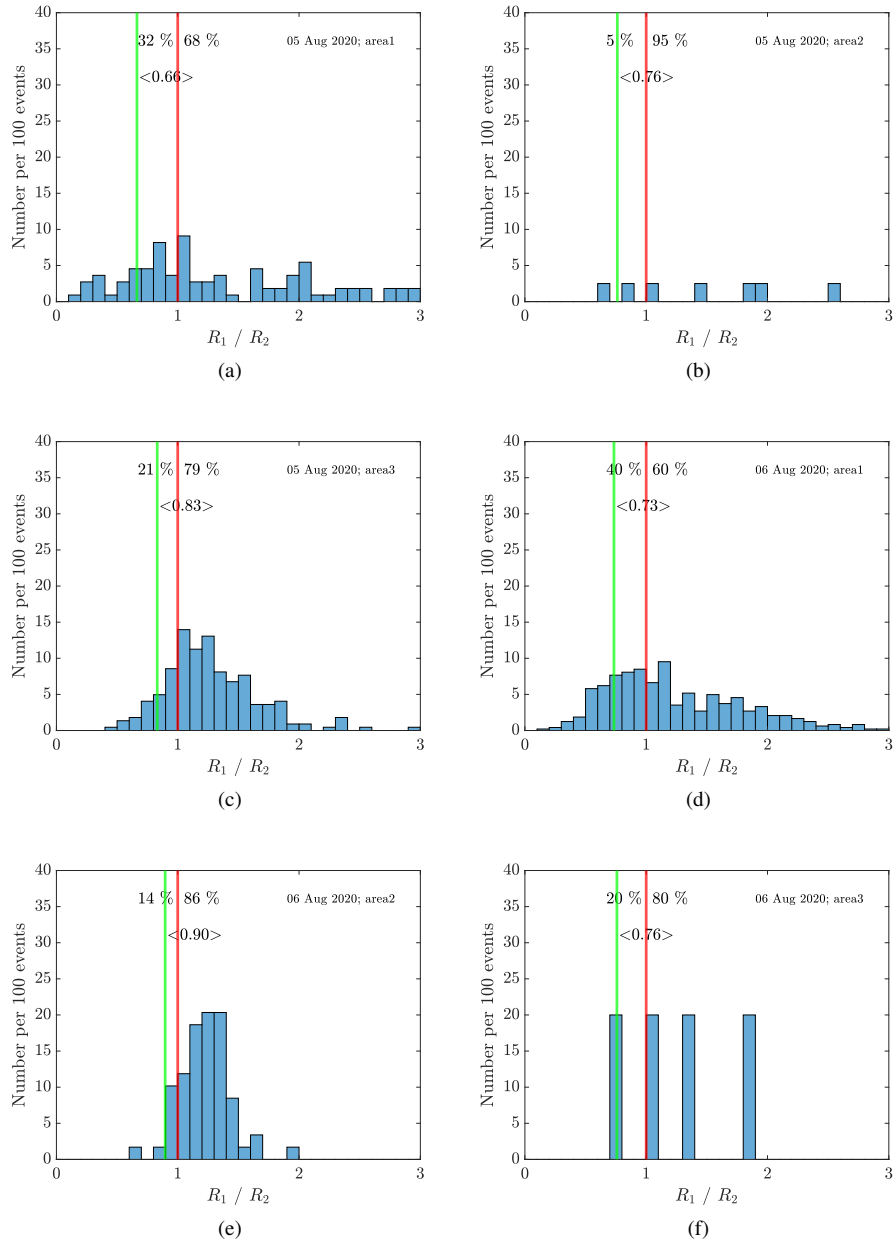

**Figure S32.** Average of the heating for the observed data on the 5 and 6 August 2020. Only overshoot curves with a minimal background amplitude of  $R_0 > 10^{10.5}$  are considered. The ratios are chosen in such a way, that, if we observe an overshoot curve like shown in Fig. ??, all ratios are smaller than 1. Thus, the histograms are clipped at a maximum ratio of 3. The green line and the corresponding number displays the mean for all ratios smaller than 1.



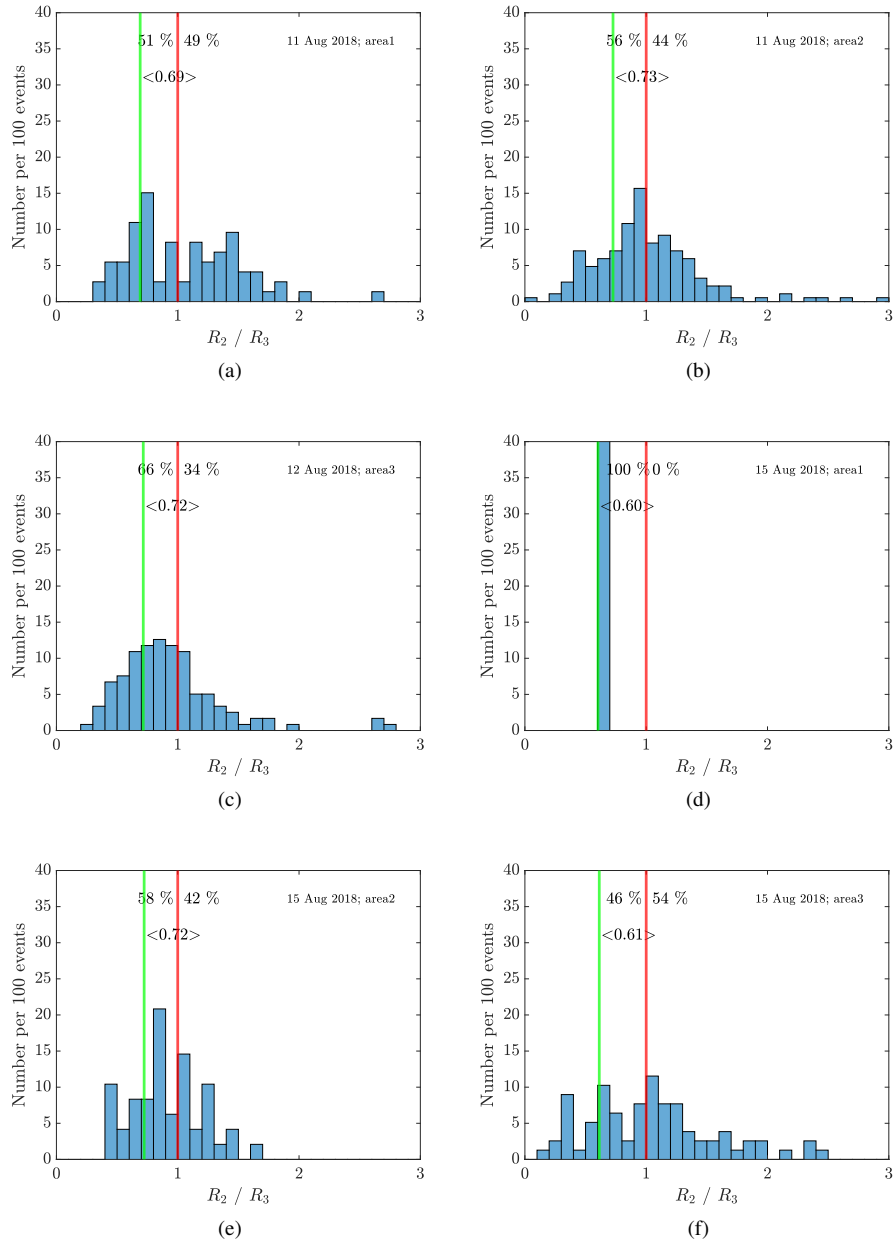

**Figure S33.** Average of the recovery for the observed data on the 11 and 15 August 2018. Only overshoot curves with a minimal background amplitude of  $R_0 > 10^{10.5}$  are considered. The ratios are chosen in such a way, that, if we observe an overshoot curve like shown in Fig. ??, all ratios are smaller than 1. Thus, the histograms are clipped at a maximum ratio of 3. The green line and the corresponding number displays the mean for all ratios smaller than 1.

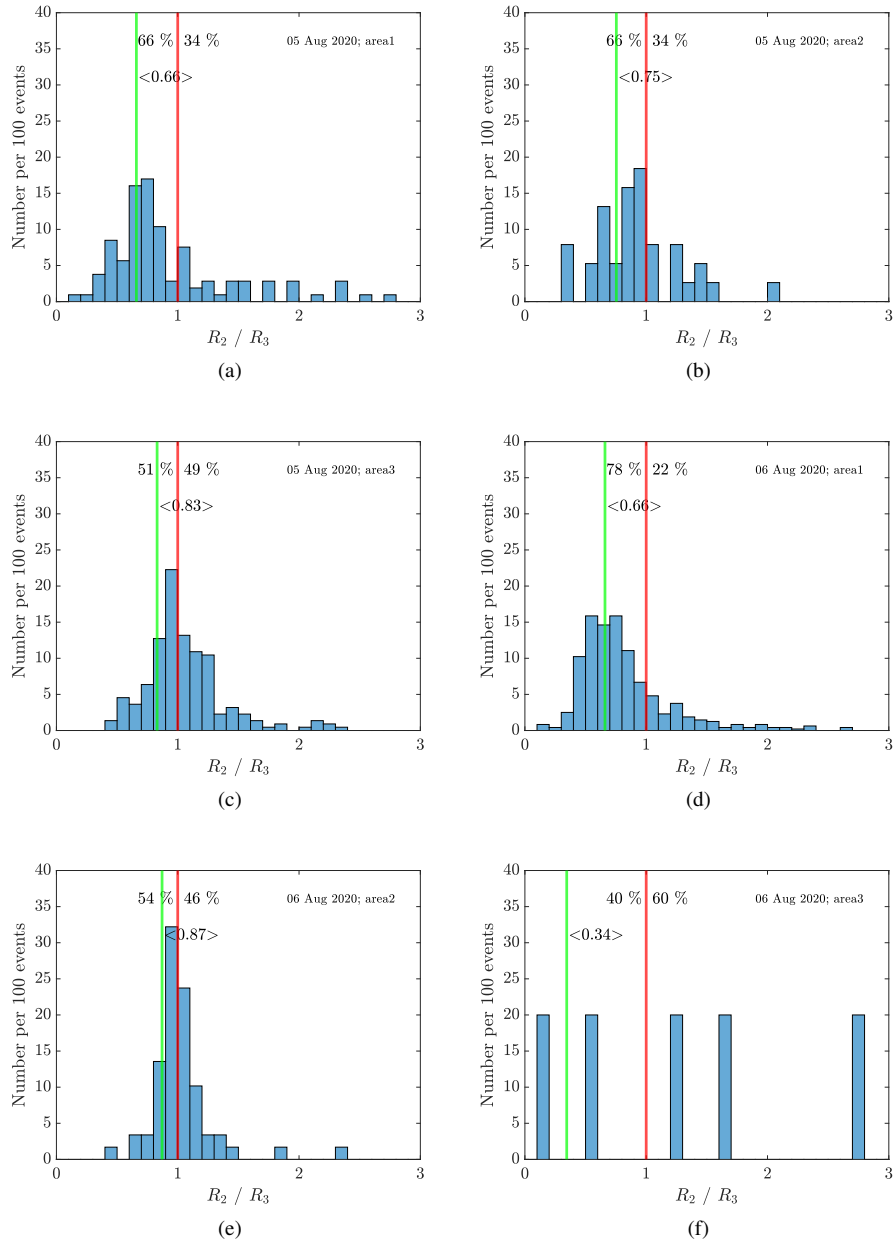

**Figure S34.** Average of the recovery for the observed data on the 5 and 6 August 2020. Only overshoot curves with a minimal background amplitude of  $R_0 > 10^{10.5}$  are considered. The ratios are chosen in such a way, that, if we observe an overshoot curve like shown in Fig. ??, all ratios are smaller than 1. Thus, the histograms are clipped at a maximum ratio of 3. The green line and the corresponding number displays the mean for all ratios smaller than 1.

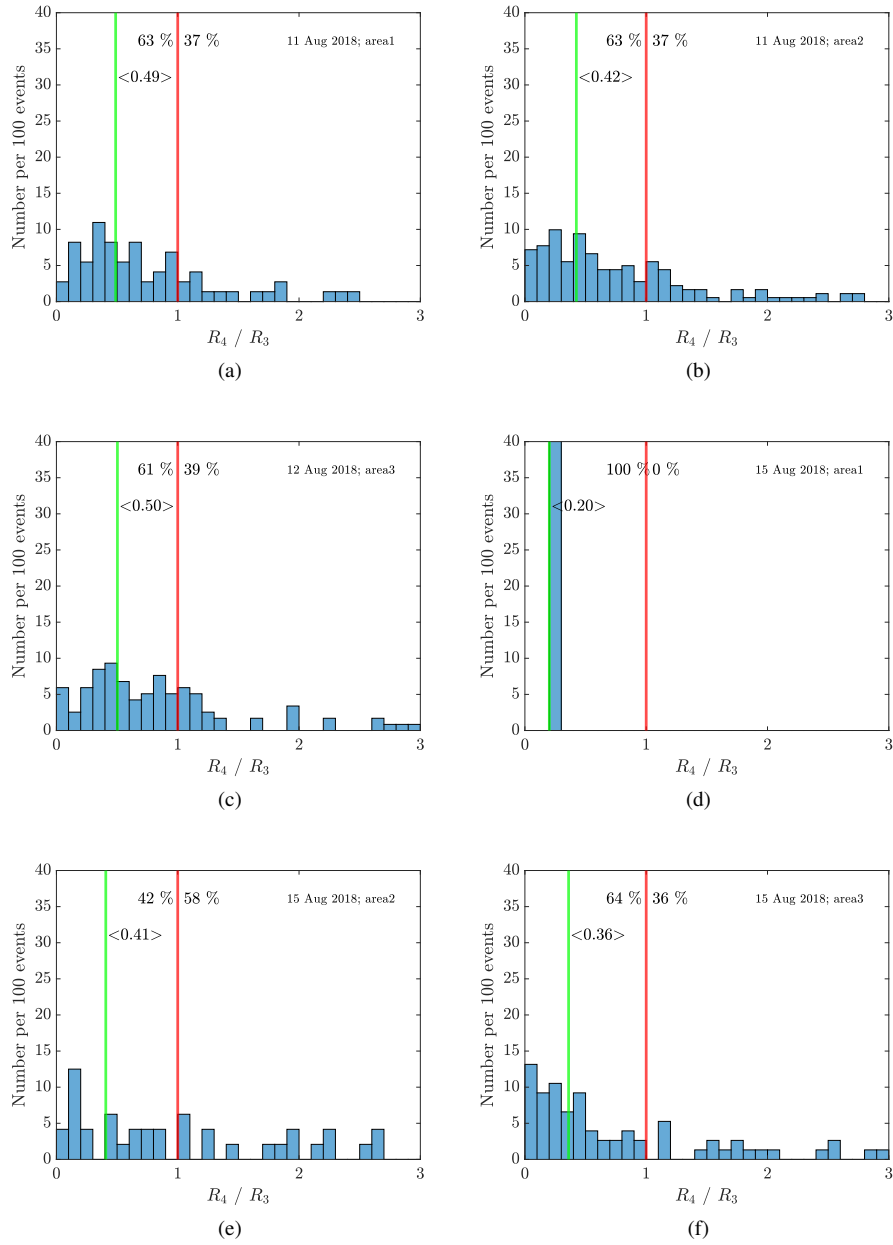

**Figure S35.** Average of the relaxation for the observed data on the 11 and 15 August 2018. Only overshoot curves with a minimal background amplitude of  $R_0 > 10^{10.5}$  are considered. The ratios are chosen in such a way, that, if we observe an overshoot curve like shown in Fig. ??, all ratios are smaller than 1. Thus, the histograms are clipped at a maximum ratio of 3. The green line and the corresponding number displays the mean for all ratios smaller than 1.

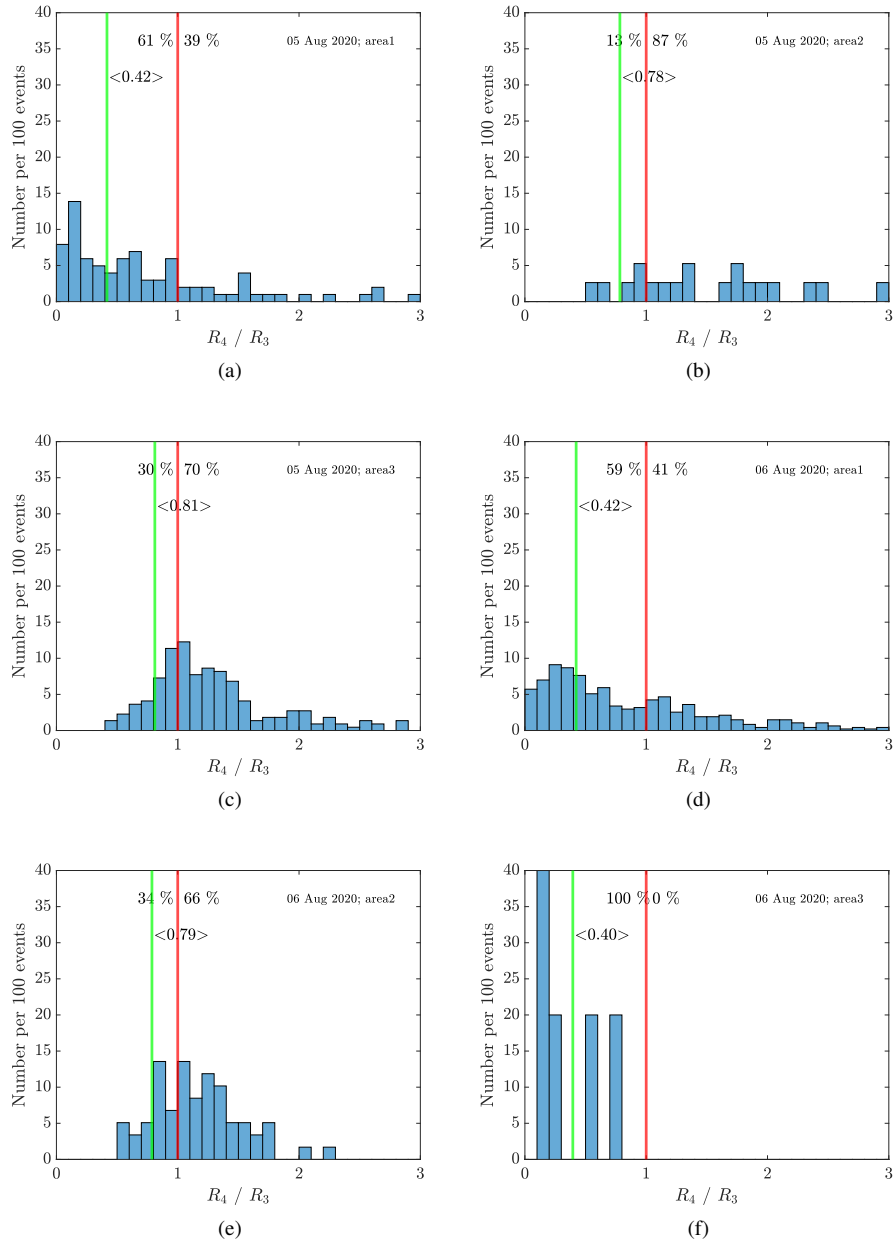

**Figure S36.** Average of the relaxation for the observed data on the 5 and 6 August 2020. Only overshoot curves with a minimal background amplitude of  $R_0 > 10^{10.5}$  are considered. The ratios are chosen in such a way, that, if we observe an overshoot curve like shown in Fig. ??, all ratios are smaller than 1. Thus, the histograms are clipped at a maximum ratio of 3. The green line and the corresponding number displays the mean for all ratios smaller than 1.
